# Supplementary material
Source: ML conference proceedings conference paper supplement (https://openaccess.thecvf.com/content/ICCV_2017/html/Su_Reasoning_About_Fine-Grained_ICCV_2017_paper.html)
Supplement: Supplementary file 1 [file Su_Reasoning_About_Fine-Grained_ICCV_2017_supplemental.pdf]

# Supplementary Material

## Reasoning about Fine-grained Attribute Phrases using Reference Games

### 1. Annotation interface for user study

We gathered responses of human annotators for the task of the listener in the RG on Amazon mechanical turk using the interface shown in Fig. 1. Annotators are asked to select if the description refers to the “Left image”, “Right image”, or “I’m not sure”. Each worker is paid \$0.10 to annotate a single group consisting of 10 descriptions generated by speakers. Three workers are independently recruited for each task.

Instructions:

- Please check if the description refers to the **airplane** in the left image or right image.
- If you are not sure which of two then click "I'm not sure".
- If there are more than one airplanes in an image consider the most prominent one.

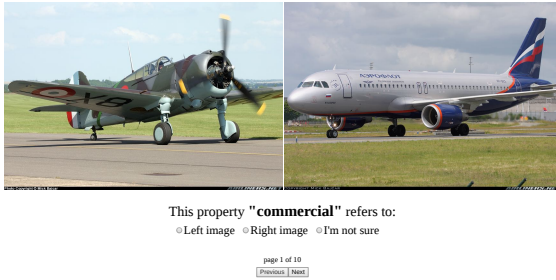

Figure 1. MTurk interface for user annotations

### 2. Additional dataset details

Some more details of the dataset are provided. Most of the attribute phrases have two words, and the longest is 12 words long. The histogram of the phrase lengths in the training set is shown in Figure 2. Additional examples of annotations are shown in Figure 3. Table 1 shows the top 20 most frequent attribute phrases, and attribute phrase pairs.

### 3. Additional results

**Visualizing attribute phrases.** Here we show more visualizations of the space of the attribute phrases. Figure 4 is the detailed version of Figure 6 in the paper. The embedded space of the contrastive phrases “ $P_1$  vs.  $P_2$ ” obtained using our discerning listener DL model in Figure 5. Figure 6 shows the embedding of images obtained by the SL. Phrases

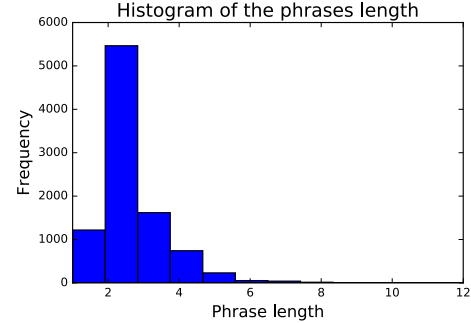

Figure 2. Histogram of the length of the attribute phrases in the training set of our dataset.

with similar semantic meanings, or images with same attributes, are clustered together.

**Image retrieval with descriptive attributes.** Figure 7 shows additional image retrieval results using SL (extension of Figure 7 in the paper.)

**Comparing speakers** Figure 8 for more examples that compare the simple and the pragmatic speakers. The last image pair is a challenging example where two images are very similar and the target image is misleading (the propeller looks like being on the wings but is in fact on the nose). SS fails on this case with most of generated phrases to be true to both images. DS successfully describes the major difference of wings and number of seats, and  $SL_r$  improves the ordering.

**Attribute-based explanations for differences between two categories.** Figure 9 shows additional examples of attributes generated as differences between two categories (more examples of Figure 8 in the paper.) The first and second example show that different phrases are generated for one category when it is compared to different categories. When compared with “A380”, “Falcon 900” is considered small (DS generates “less windows”); When compared with “DR-400”, “Falcon 900” is considered large (DS generates “large plane”). It reveals that DS has learnt the relative nature of phrases.

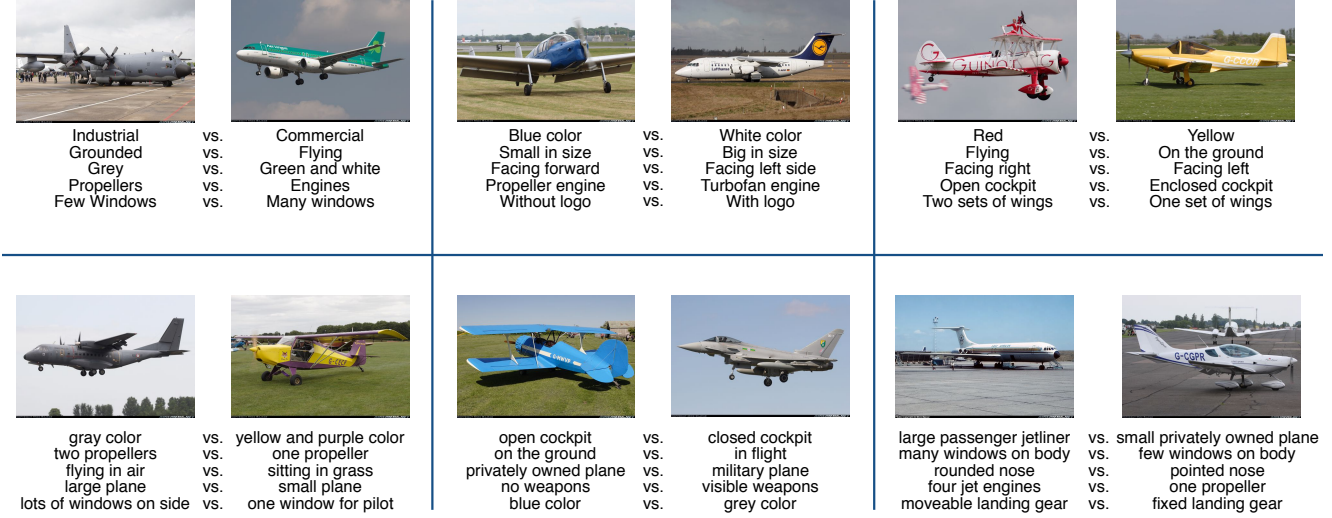

Figure 3. More example annotations from our dataset.

|    | Phrases           | Freq. | Phrase pairs                        | Freq. |
|----|-------------------|-------|-------------------------------------|-------|
| 1  | facing left       | 1258  | facing right VS facing left         | 603   |
| 2  | facing right      | 1214  | facing left VS facing right         | 540   |
| 3  | on the ground     | 785   | on the ground VS in the air         | 198   |
| 4  | private plane     | 647   | in the air VS on the ground         | 165   |
| 5  | small plane       | 550   | commercial plane VS private plane   | 158   |
| 6  | commercial plane  | 516   | private plane VS commercial plane   | 155   |
| 7  | in the air        | 458   | large plane VS small plane          | 110   |
| 8  | white color       | 402   | on the ground VS flying in the air  | 104   |
| 9  | white             | 376   | propellor engine VS turbofan engine | 98    |
| 10 | turbofan engine   | 328   | small plane VS big plane            | 92    |
| 11 | propellor engine  | 310   | big plane VS small plane            | 91    |
| 12 | propeller engine  | 291   | flying in the air VS on the ground  | 90    |
| 13 | single engine     | 289   | small VS large                      | 87    |
| 14 | on ground         | 288   | in air VS on ground                 | 85    |
| 15 | flying in the air | 281   | outside VS inside                   | 85    |
| 16 | military plane    | 252   | turbofan engine VS propellor engine | 84    |
| 17 | small             | 240   | large VS small                      | 83    |
| 18 | large plane       | 238   | small plane VS large plane          | 81    |
| 19 | jet engine        | 233   | on ground VS in air                 | 81    |
| 20 | big plane         | 233   | inside VS outside                   | 68    |

Table 1. Top 20 attribute phrases and contrastive attribute phrases from the training set in our dataset.

The last example is a challenging one with two very similar categories. The model fails in a pattern of describing undistinguishable attributes (engine, stabilizer) and attributes irrelative with categories (color, on ground or not). It also emphasizes that “757-200” is smaller than “A310”, but in fact they have similar size.

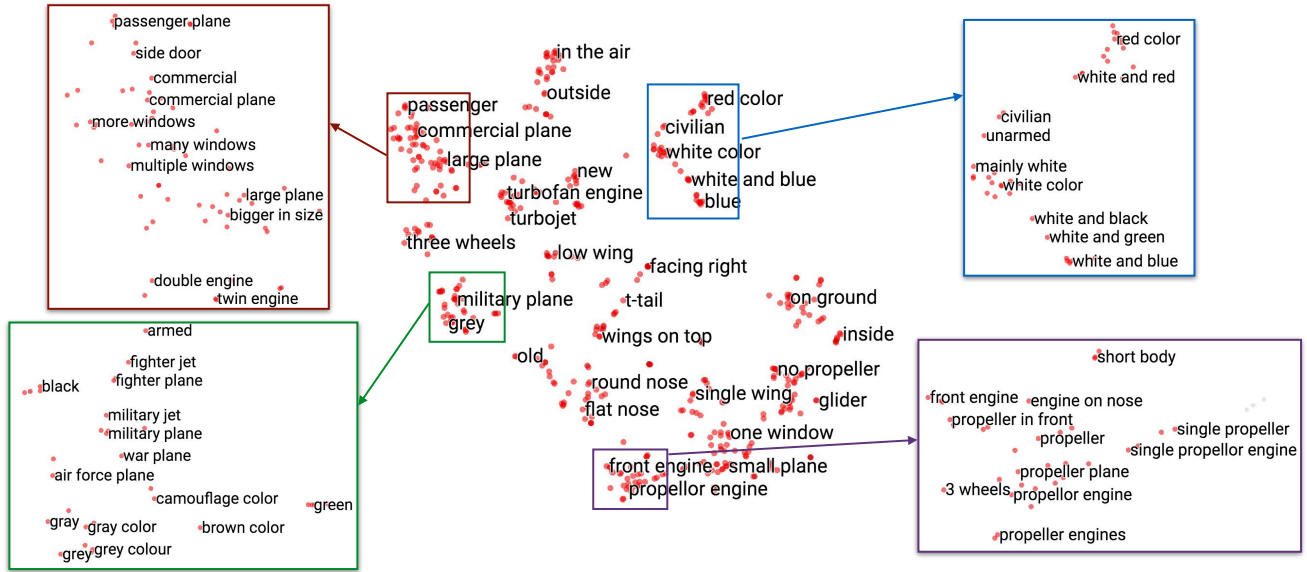

Figure 4. t-SNE embedding of attribute phrases from our simple listener (SL) model.

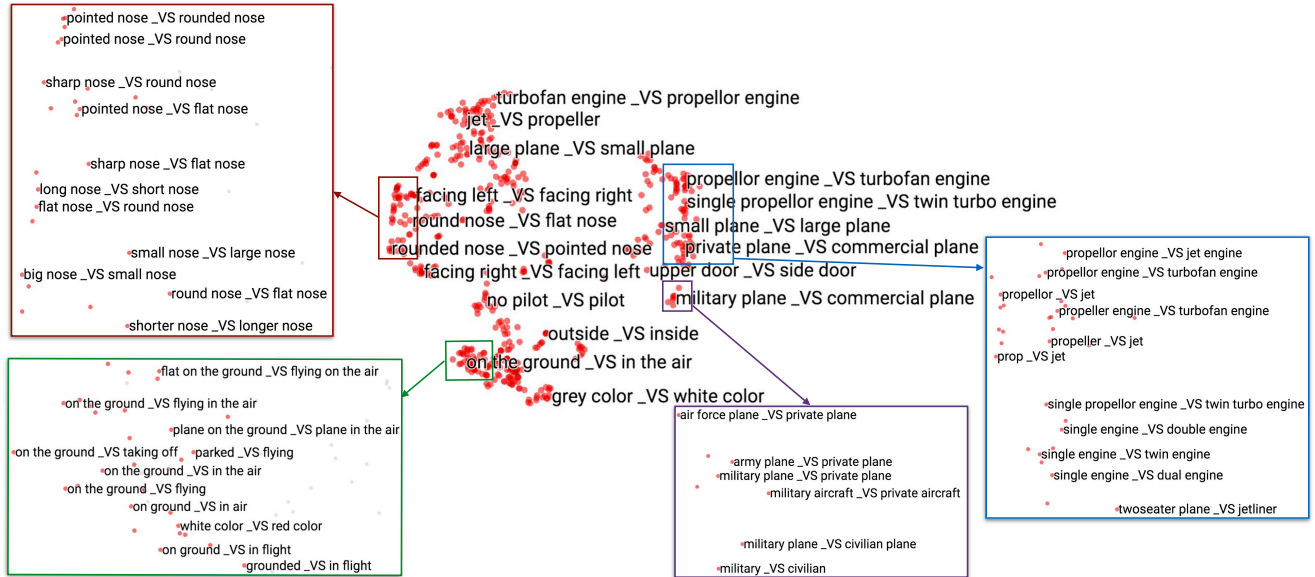

Figure 5. t-SNE embedding of contrastive attribute phrases, e.g. “P<sub>1</sub> vs. P<sub>2</sub>”, from our discerning listener (DL) model.

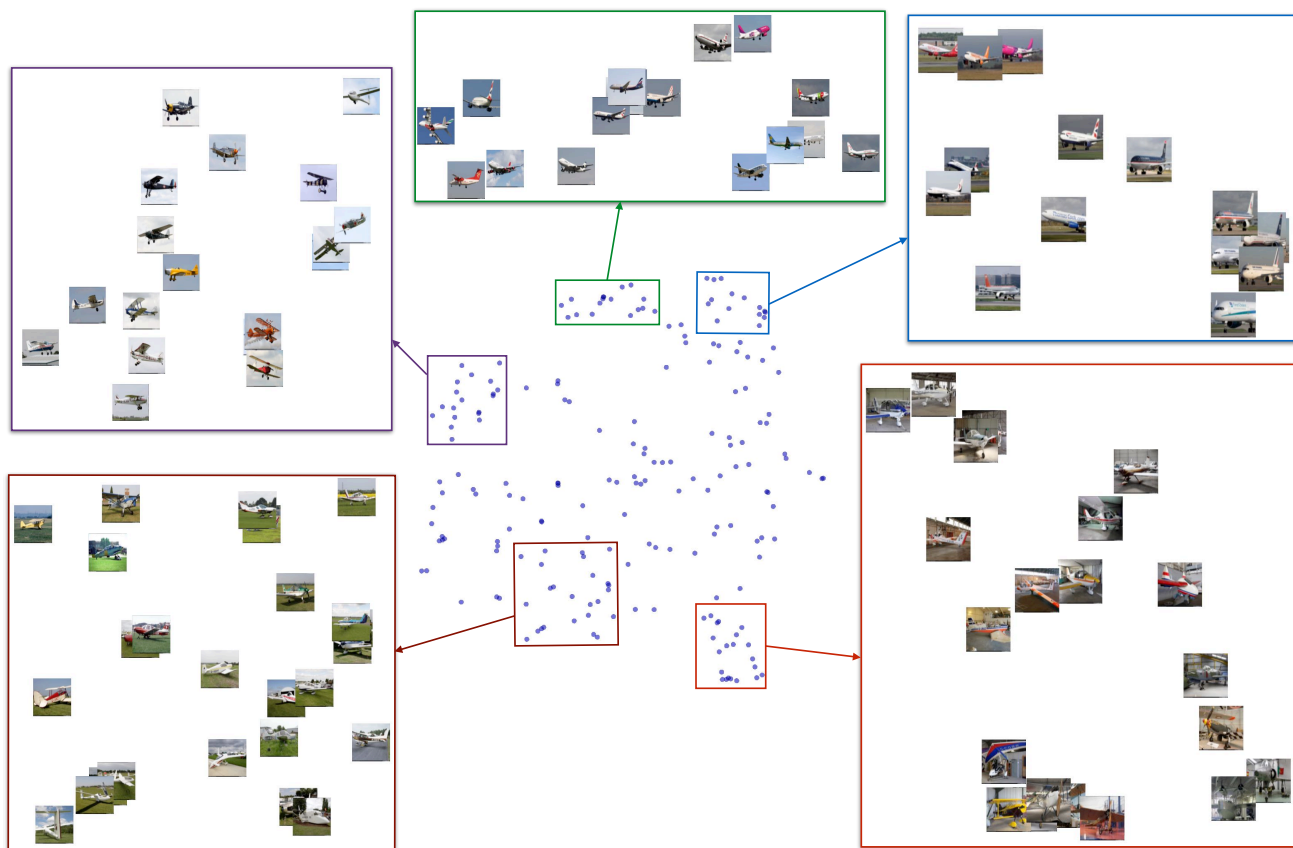

Figure 6. t-SNE embedding of 200 randomly selected images using our simple listener (SL) model. Images have same attributes are clustered together. For example, highlighted five boxes in the figure have the attribute “private plane on grass”, “private plane in the air”, “passenger plane in the air”, passenger plane on runway”, and “in hangar”.



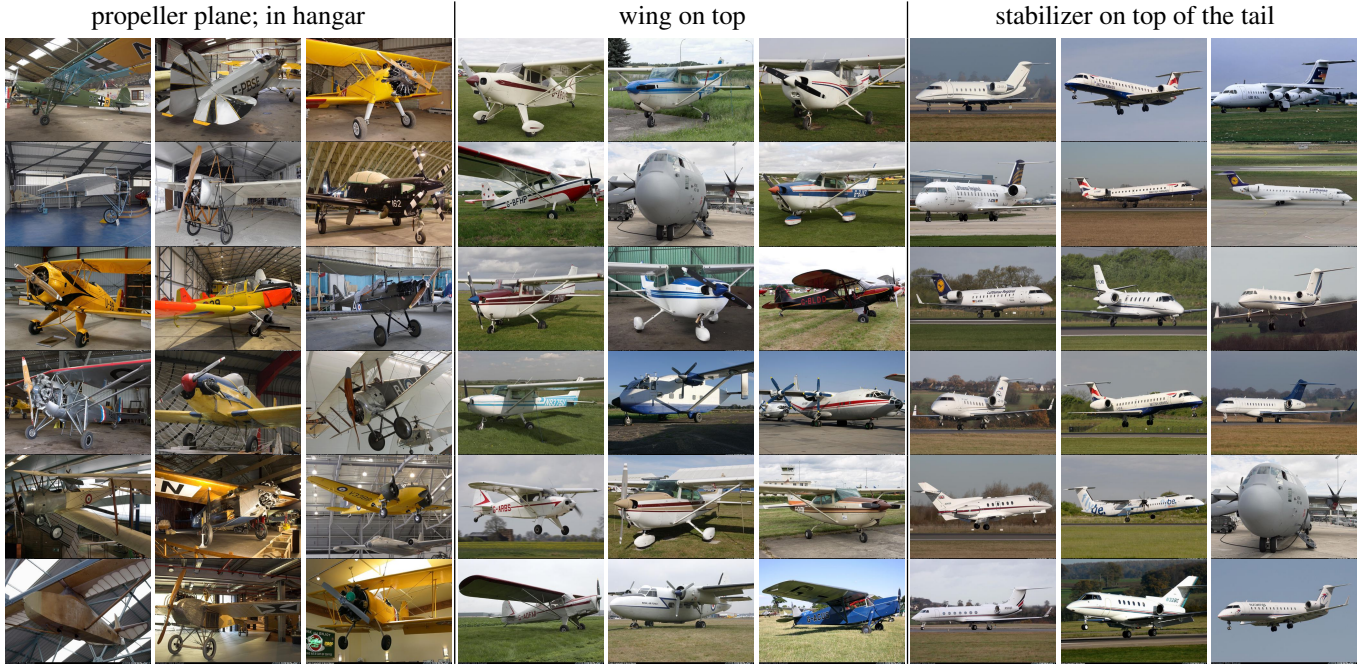

Figure 7. Top 18 images ranked by the listener for various attribute phrases as queries (shown on top). We rank the images by the scores from the simple listener SL on the concatenation of the attribute phrases. The images are ordered from top to bottom, left to right.

|                                                                                                                                                                         |                                                                                                                                                                                                                                   |                                                                                                                                                                                                                                                    |                                                                                                                                                                                                             |                                                                                                                                                                                                                              |
|-------------------------------------------------------------------------------------------------------------------------------------------------------------------------|-----------------------------------------------------------------------------------------------------------------------------------------------------------------------------------------------------------------------------------|----------------------------------------------------------------------------------------------------------------------------------------------------------------------------------------------------------------------------------------------------|-------------------------------------------------------------------------------------------------------------------------------------------------------------------------------------------------------------|------------------------------------------------------------------------------------------------------------------------------------------------------------------------------------------------------------------------------|
|   | <b>SS:</b><br>? facing right<br>✓ military plane<br>✓ on ground<br>✓ no windows on body<br>✓ on the ground<br>✓ small plane<br>? outside<br>✓ grey<br>✓ jet engine<br>✓ fighter plane                                             | <b>SS + SL<sub>r</sub>:</b><br>✓ fighter plane<br>✓ small plane<br>✓ military plane<br>✓ no windows on body<br>✓ on the ground<br>✓ on ground<br>? facing right<br>✓ grey<br>✓ jet engine<br>? outside                                             | <b>DS:</b><br>? facing right<br>✓ small plane<br>✓ small<br>✓ grey color<br>✓ military plane<br>✓ small plane<br>? propellor engine<br>✓ single engine<br>✓ few windows<br>✓ two seater plane               | <b>DS + SL<sub>r</sub>:</b><br>✓ single engine<br>✓ two seater plane<br>? propellor engine<br>✓ small<br>✓ small plane<br>✓ small plane<br>✓ military plane<br>✓ few windows<br>? facing right<br>✓ grey color               |
|   | <b>SS:</b><br>✓ facing left<br>✓ jet engine<br>✓ jet fighter<br>✓ military<br>✗ on the ground<br>✓ fighter jet<br>✓ military plane<br>? turbofan engine<br>✗ single engine<br>✗ facing right                                      | <b>SS + SL<sub>r</sub>:</b><br>✓ jet fighter<br>✓ fighter jet<br>✓ jet engine<br>✓ military plane<br>✓ military<br>? turbofan engine<br>✓ facing left<br>✗ on the ground<br>✗ single engine<br>✗ facing right                                      | <b>DS:</b><br>✓ army plane<br>✗ facing right<br>✓ military plane<br>✓ jet engine<br>✓ gray color<br>✓ facing left<br>✓ on runway<br>✓ turbofan engine<br>✓ gray in color<br>✓ black in color                | <b>DS + SL<sub>r</sub>:</b><br>✓ jet engine<br>✓ on runway<br>✓ black in color<br>✓ military plane<br>✓ turbofan engine<br>✓ army plane<br>✓ facing left<br>✓ gray in color<br>✓ gray color<br>✗ facing right                |
|   | <b>SS:</b><br>? military plane<br>? propellor engine<br>? facing left<br>? in flight<br>? open cockpit<br>? _UNK between front wheels<br>? single propellor engine<br>✗ single person aircraft<br>✓ no cone on nose<br>? military | <b>SS + SL<sub>r</sub>:</b><br>? military plane<br>? facing left<br>? open cockpit<br>? military<br>? propellor engine<br>? in flight<br>✗ single person aircraft<br>? _UNK between front wheels<br>✓ no cone on nose<br>? single propellor engine | <b>DS:</b><br>? facing the left<br>✗ three wheels<br>? twin propellor<br>✓ two seater<br>? green and yellow<br>✓ one set of wings in front<br>✓ 2 seater<br>? no fan in nose<br>✓ single wing<br>✓ 2 seater | <b>DS + SL<sub>r</sub>:</b><br>? twin propellor<br>✓ 2 seater<br>✓ 2 seater<br>? facing the left<br>✓ two seater<br>✓ single wing<br>✗ three wheels<br>? no fan in nose<br>✓ one set of wings in front<br>? green and yellow |

Figure 8. More pragmatic speaker results. Given the image pairs in the left as input, we use SS and DS to generate phrases, and then use SL<sub>r</sub> to rerank them. SL<sub>r</sub> only takes the descriptions targeted at images in green boxes as input. Green checks mean human listener picks correct image with majority vote, X marks mean human listener picks opposite image with majority vote, and question marks mean human listener is uncertain which image is referred to.

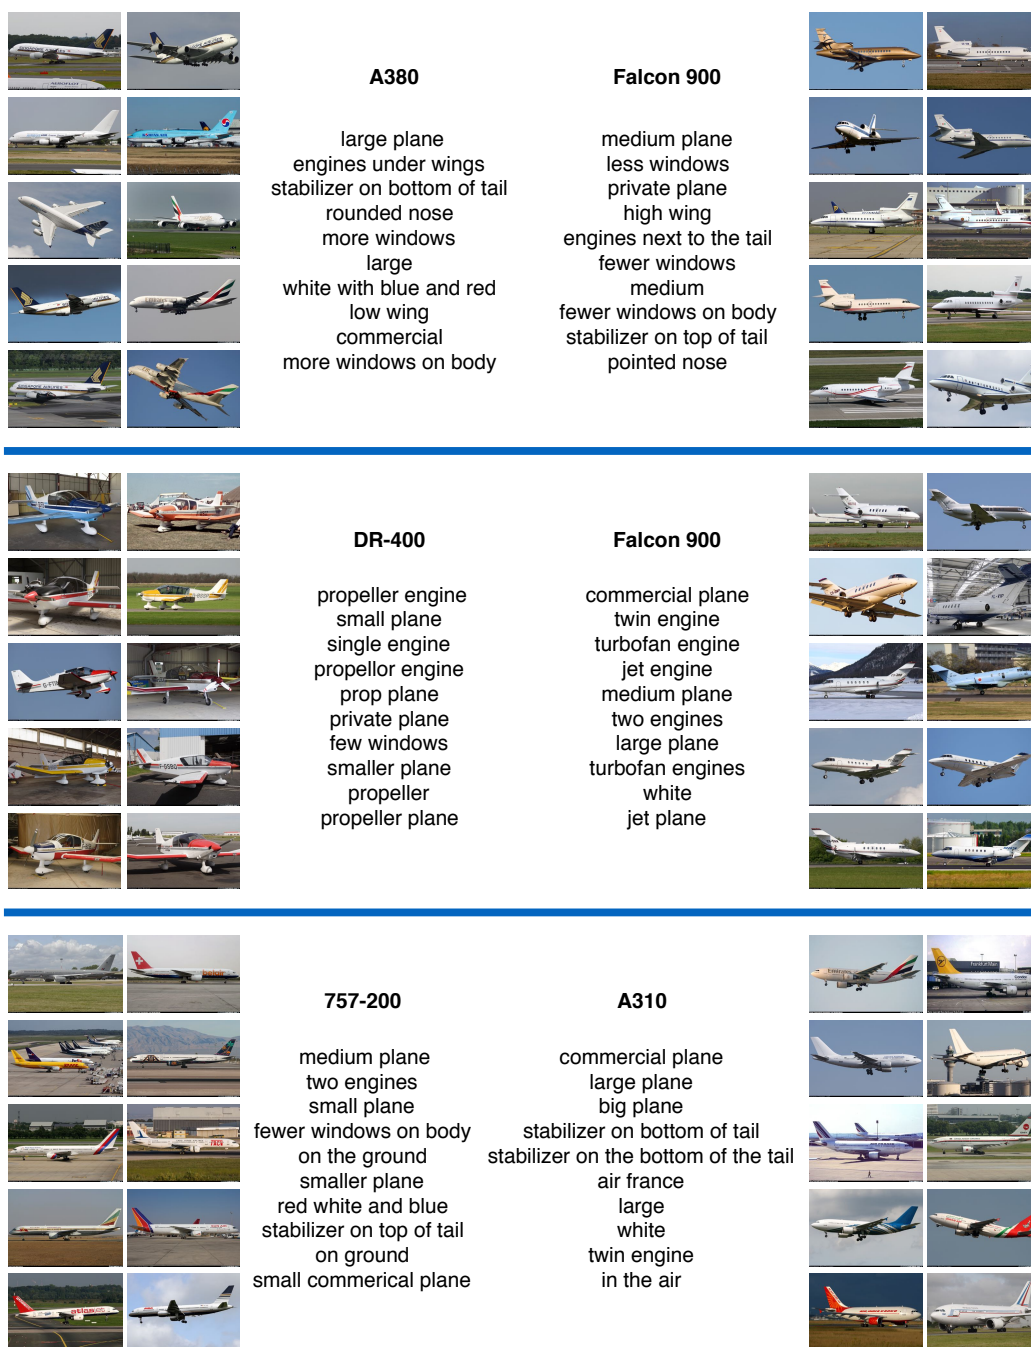

Figure 9. More examples of attribute-based explanations for visual differences between two categories. Phrases are generated by DS and sorted by their occurrence frequency.
